# Supplementary material for: Cost-effectiveness of preventive case management for parents with a mental illness: a randomized controlled trial from three economic perspectives
Source: Springer Nature journal article supplement (doi:10.1186/s12913-016-1498-z), 2016-07-07

## Alternative scenario A

### Healthcare perspective

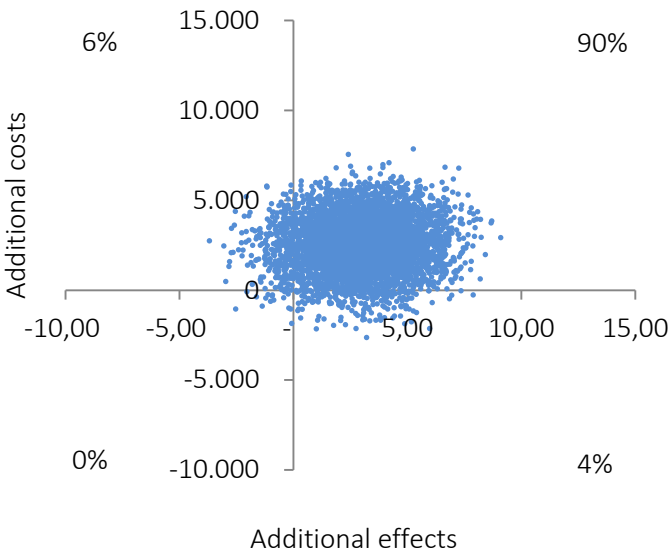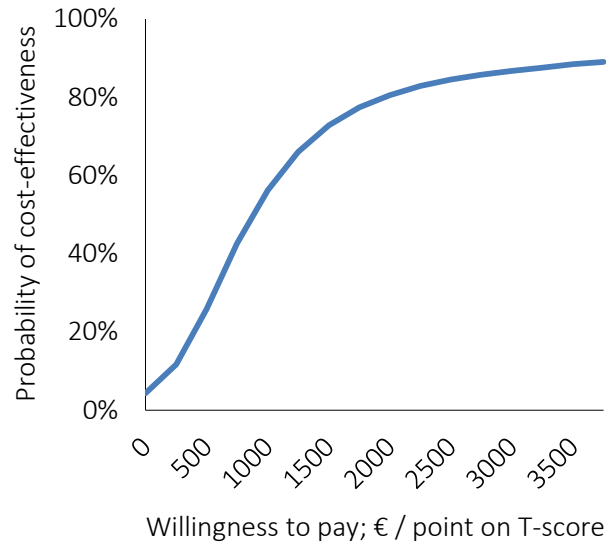

### Social care perspective

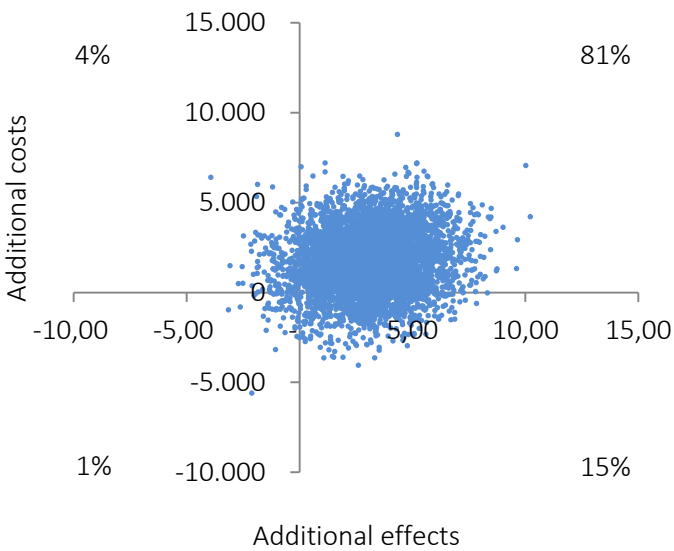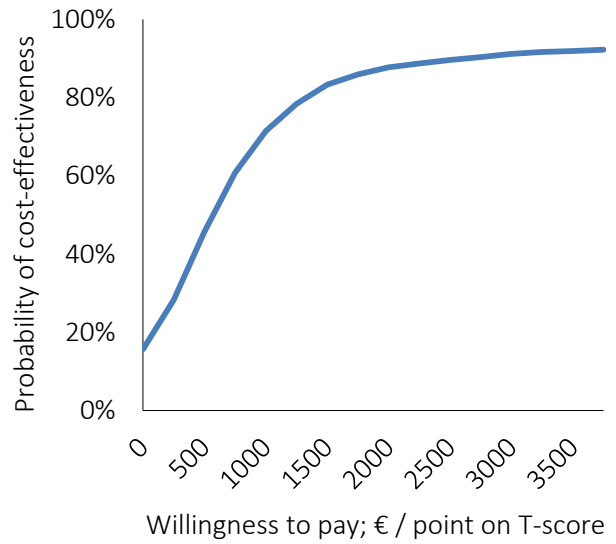

### Societal perspective

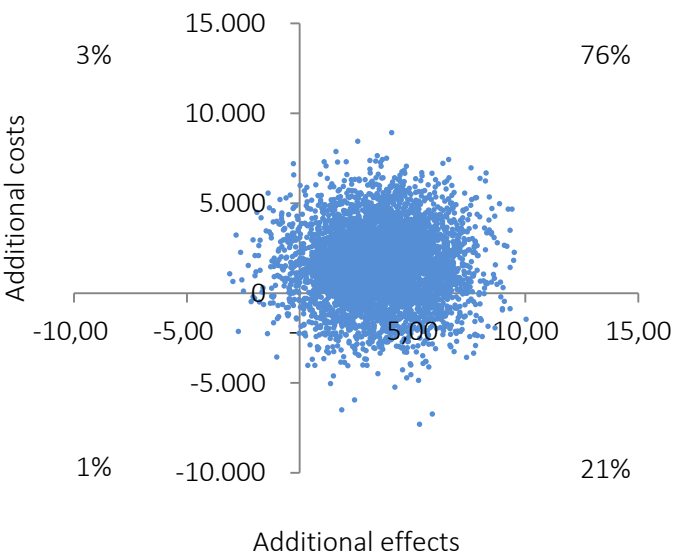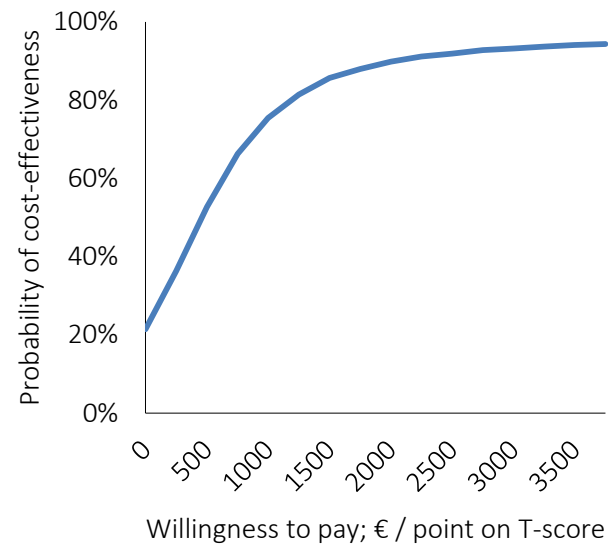

## Alternative scenario B

### Healthcare perspective

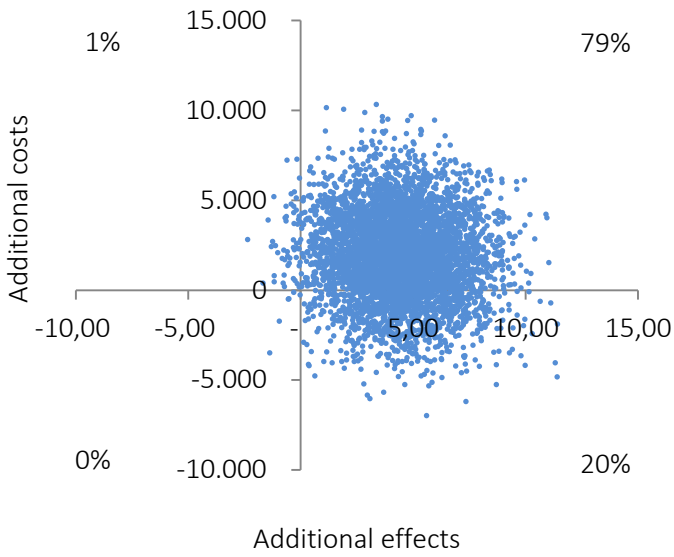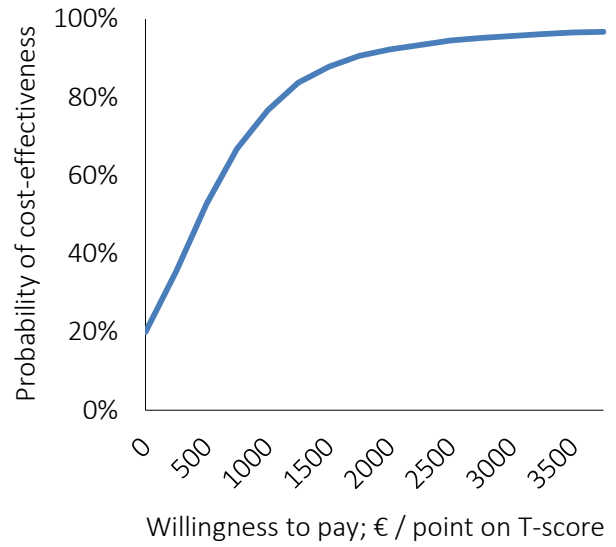

### Social care perspective

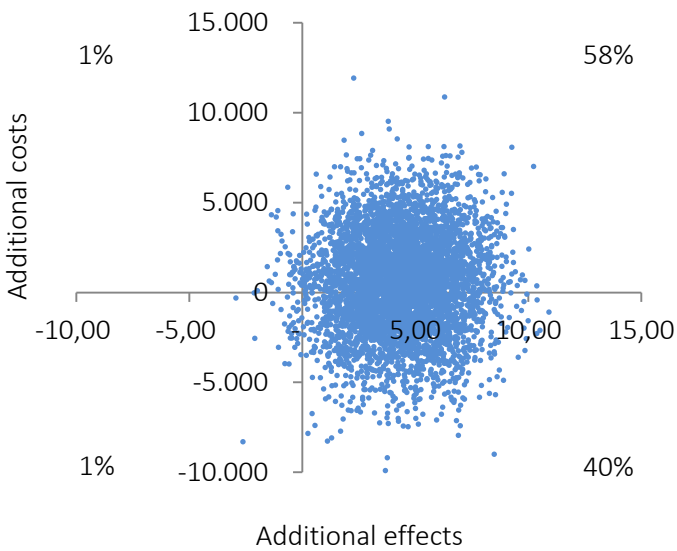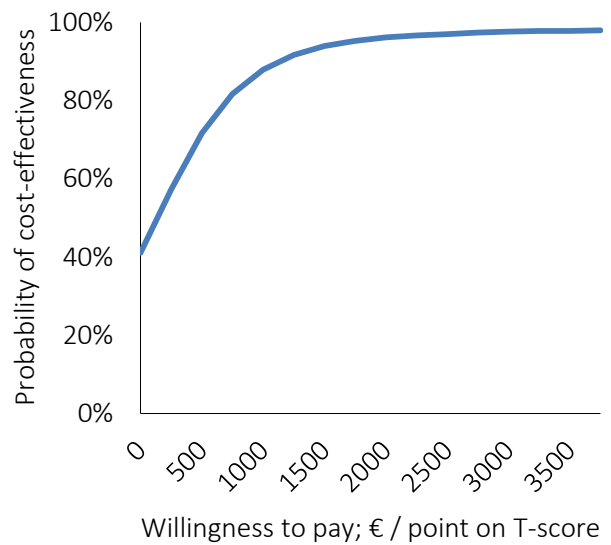

### Societal perspective

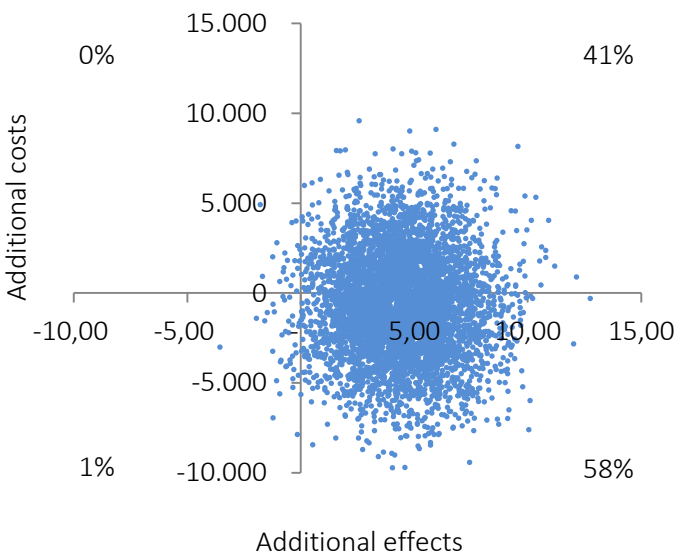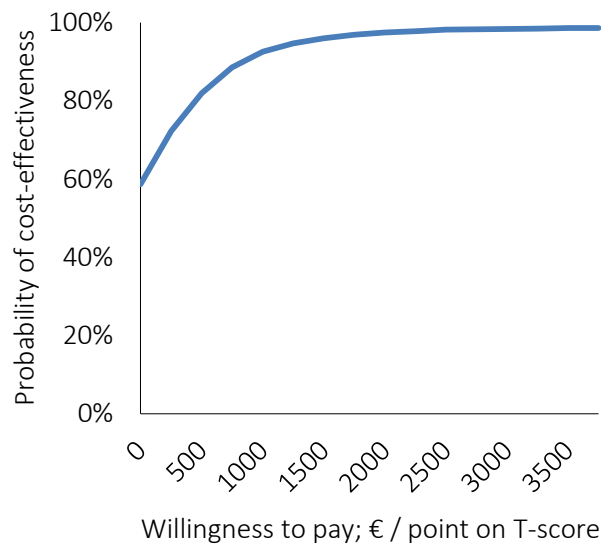

## Alternative scenario C

### Healthcare perspective

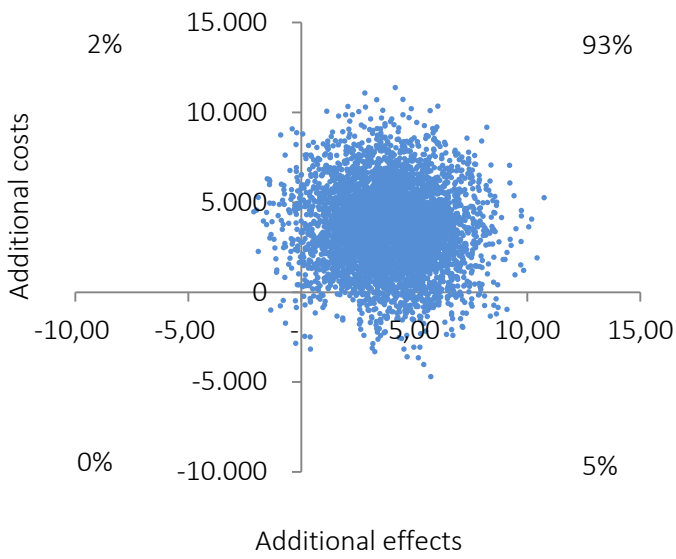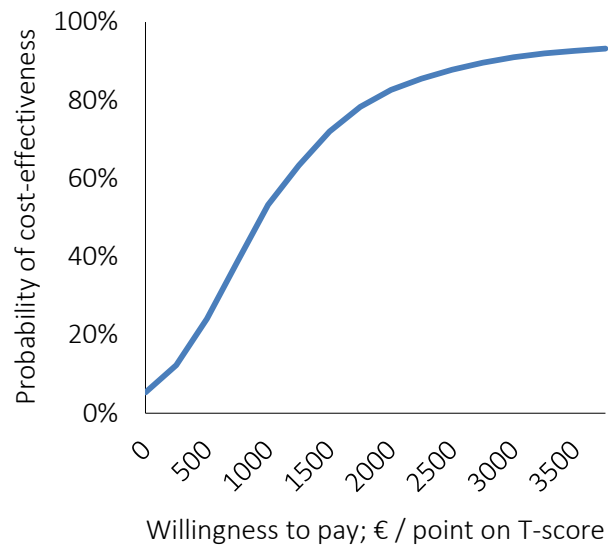

### Social care perspective

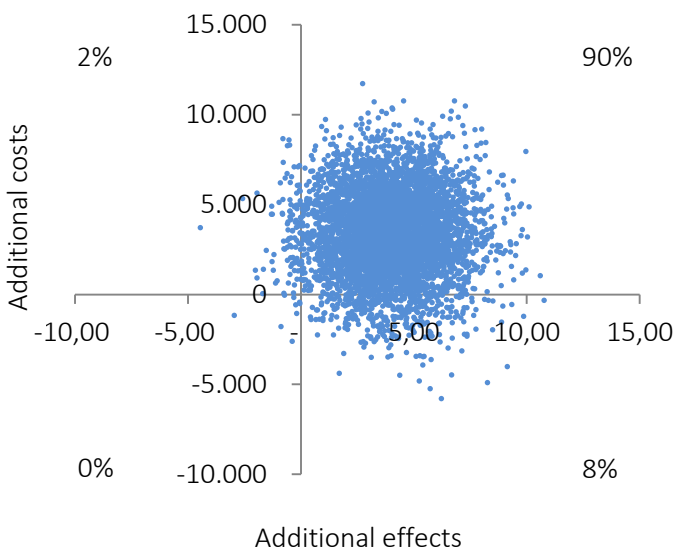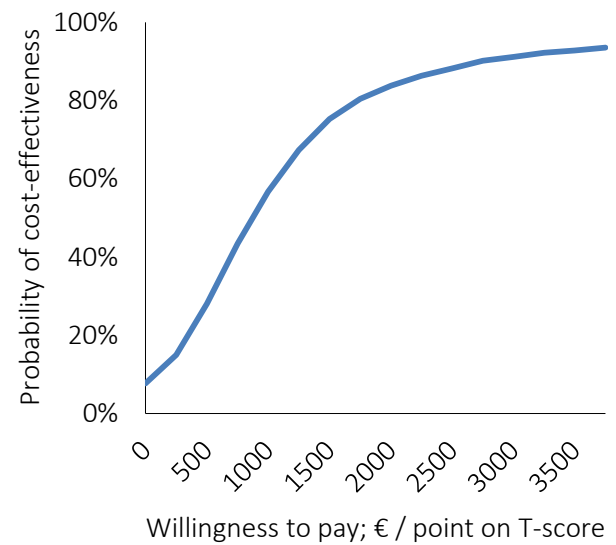

### Societal perspective

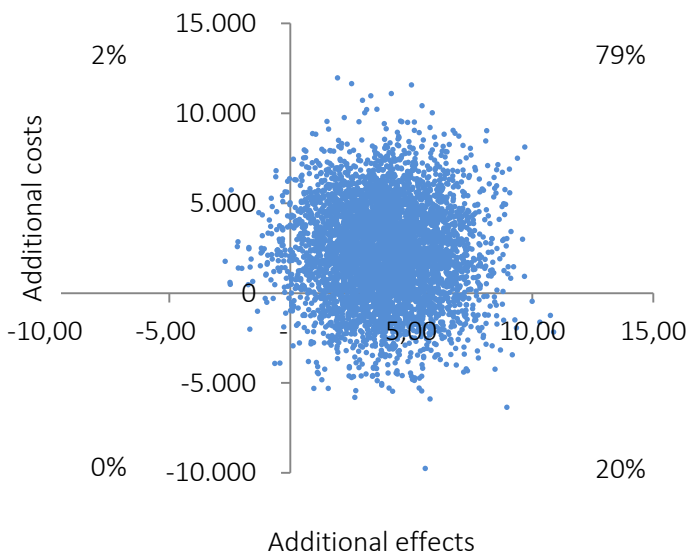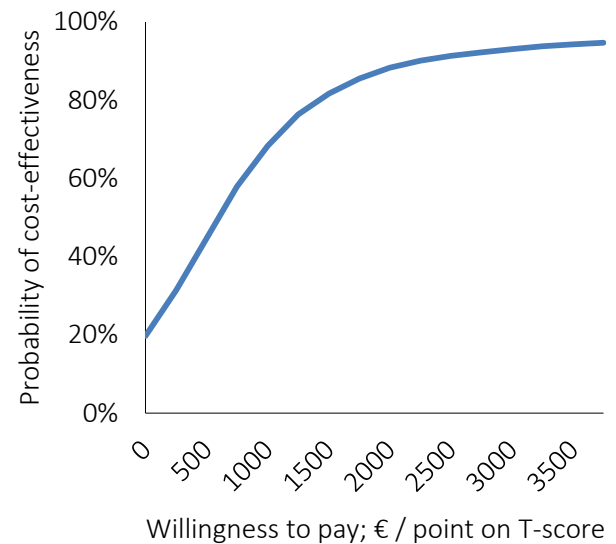

## Alternative scenario D

### Healthcare perspective

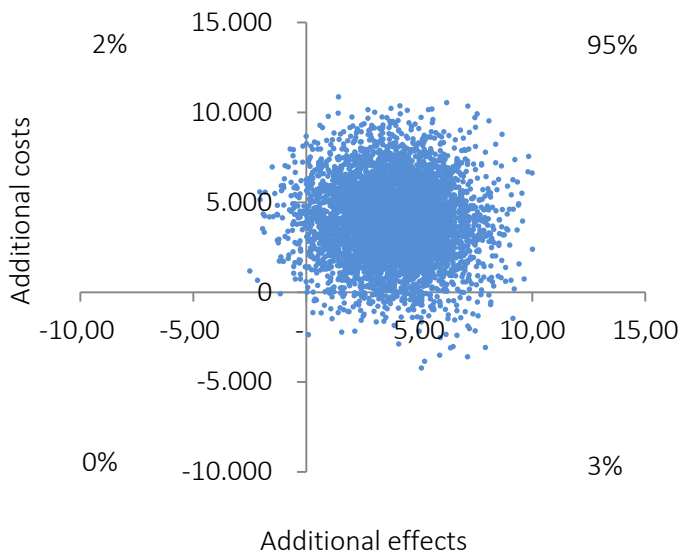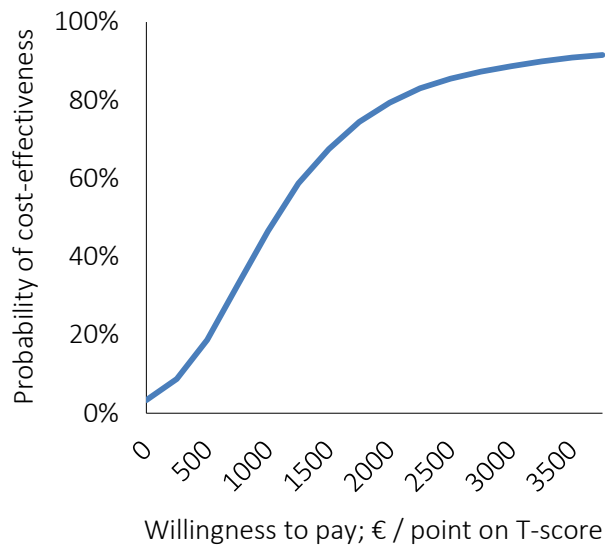

### Social care perspective

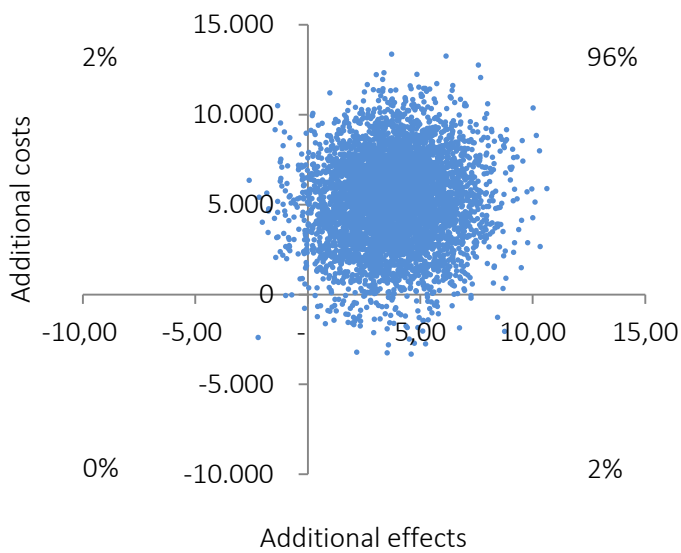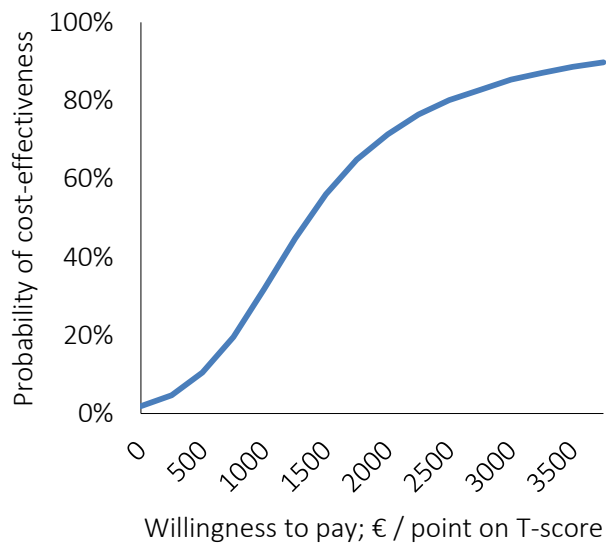

### Societal perspective

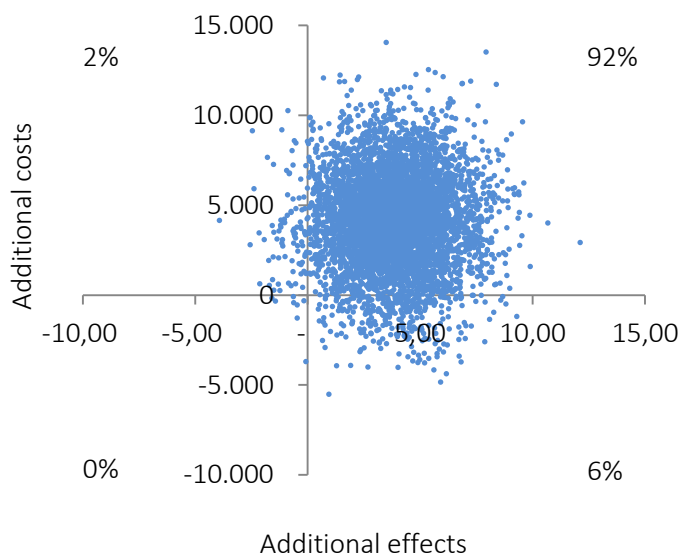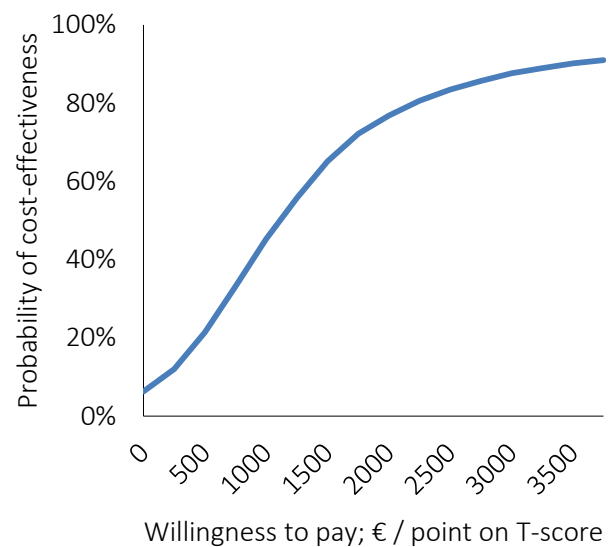

Supplement: MOESM2 [file 10351946]
